# Supplementary material for: Red-blood-cell-membrane-enveloped magnetic nanoclusters as a biomimetic theranostic nanoplatform for bimodal imaging-guided cancer photothermal therapy
Source: Royal Society of Chemistry journal article supplement (doi:10.1039/c9tb01829h), 2019-12-14
Supplement: c9tb01829h1.pdf [file c9tb01829h1.pdf]

## Supporting Information

### Red-Blood-Cell-Membrane-Enveloped Magnetic Nanoclusters as a Biomimetic Theranostic Nanoplatform for Bimodal Imaging Guided Cancer Photothermal Therapy

Sheng Wang<sup>#,\*</sup>, Yipengchen Yin<sup>#</sup>, Wang Song<sup>#</sup>, Qin Zhang, Zhijuan Yang, Ziliang Dong, Ye Xu, Sanjun Cai, Kuang Wang, Wuli Yang, Xuejun Wang, Zhiqing Pang<sup>\*</sup>, Liangzhu Feng<sup>\*</sup>

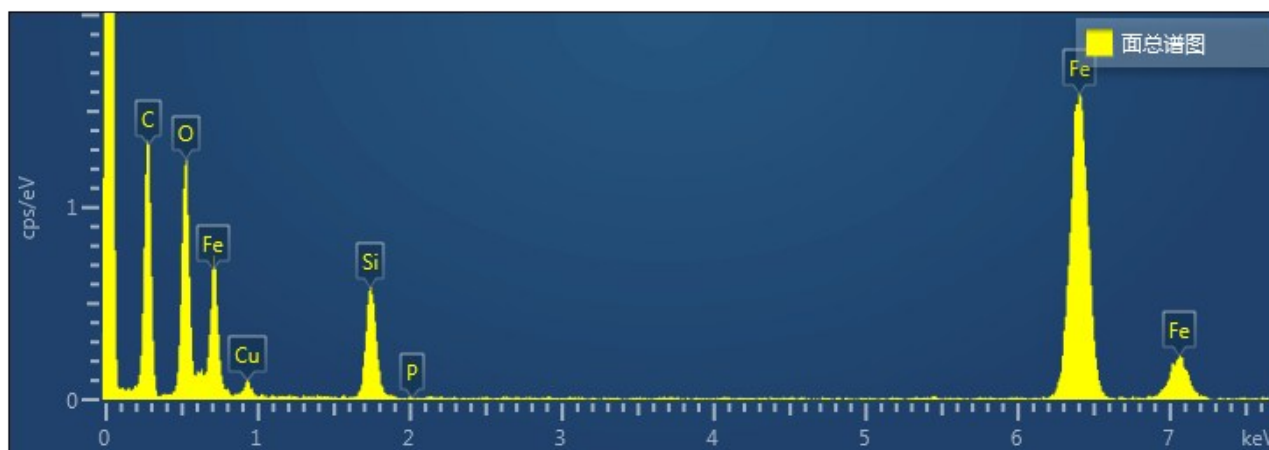

Figure S1. EDX spectrum of as-prepared MNCs.

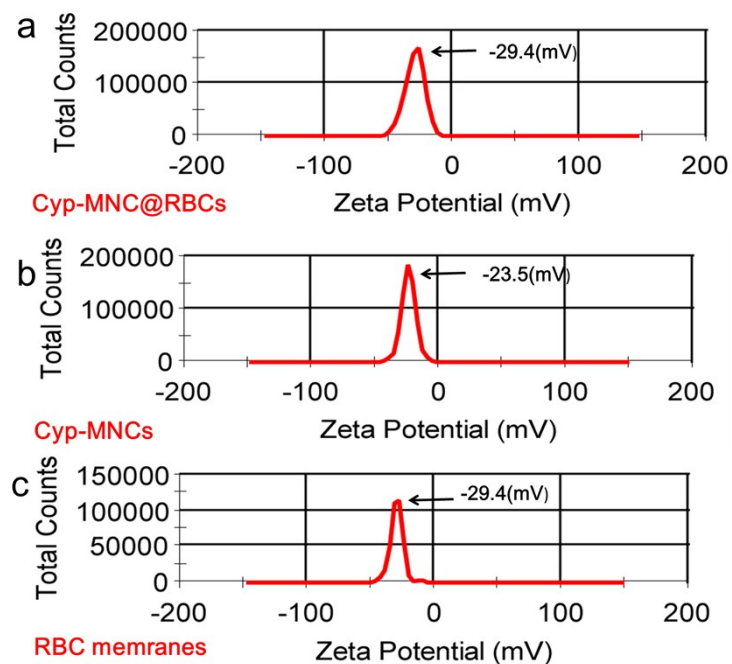

Figure S2. Zeta potentials of Cyp-MNC@RBCs, Cyp-MNCs and RBCs.

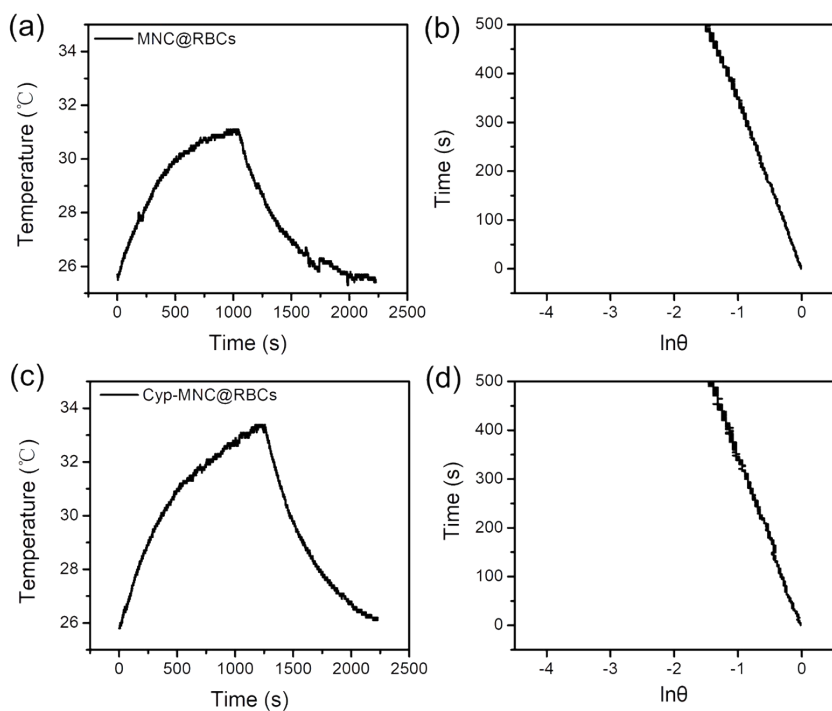

**Figure S3.** Temperature changing curves of MNC@RBCs (a&b), and Cyp-MNC@RBCs (c&d) under the laser exposure and corresponding cooling process.

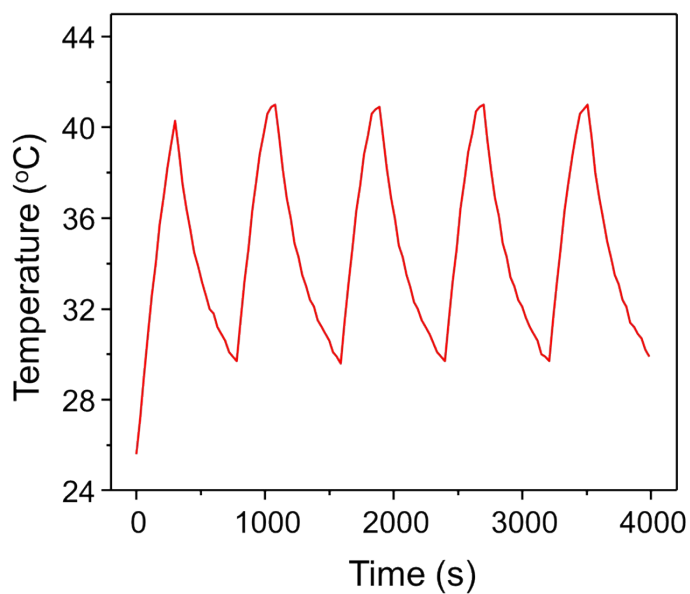

**Figure S4.** The temperature changing curves of the aqueous solutions of Cyp-MNC@RBCs during 5 cycles of laser-on and laser-off.

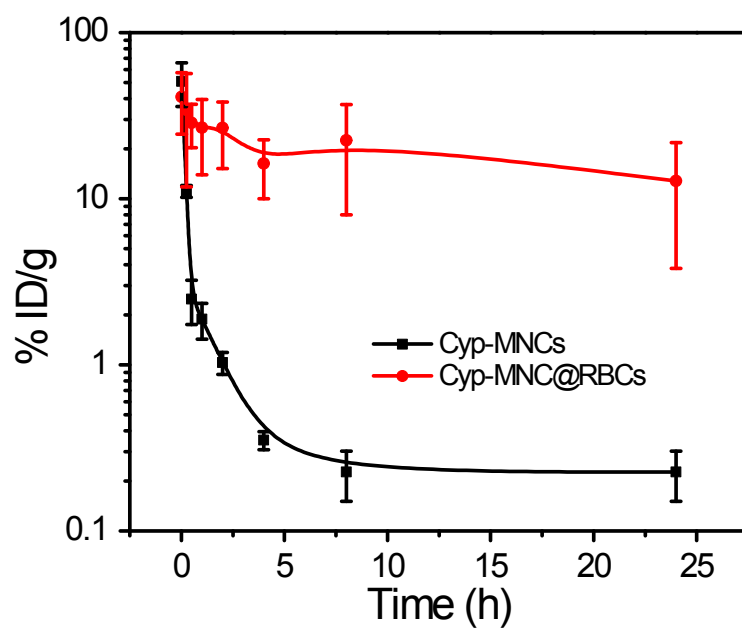

**Figure S5.** Blood circulation profiles of Cyp-MNCs and Cyp-MNC@RBCs.

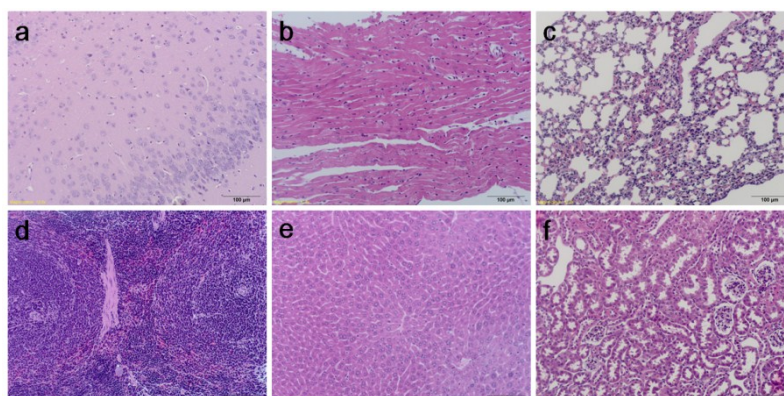

**Figure S6.** H&E staining of slices of (a) brain, (b) heart, (c) lung, (d) spleen, (e) liver and (f) kidney collected from the mice treated with intravenous injection of Cyp-MNC@RBCs plus 808 nm laser irradiation at day 9.
